# Supplementary material for: Heteroleptic Ir(iii) complexes containing both azolate chromophoric chelate and diphenylphosphinoaryl cyclometalates; Reactivities, electronic properties and applications
Source: Royal Society of Chemistry journal article supplement (doi:10.1039/c0dt00966k), 2010-12-20
Supplement: c0dt00966k.pdf [file c0dt00966k.pdf]

## Electronic Supporting Information

### **Heteroleptic Ir(III) Complexes Containing both Azolate Chromophoric Chelate and Diphenylphosphinoaryl Cyclometalates; Reactivities, Electronic Properties and Applications**

Chen-Huey Lin,<sup>a</sup> Yun Chi,<sup>\*,a</sup> Min-Wen Chung,<sup>b</sup> Yi-Ju Chen,<sup>b</sup> Kang-Wei Wang,<sup>b</sup> Gene-Hsiang Lee,<sup>b</sup> Pi-Tai Chou,<sup>\*,b</sup> Wen-Yi Hung,<sup>\*,c</sup> Hao-Chih Chiu<sup>c</sup>

<sup>a</sup> Department of Chemistry, National Tsing Hua University, Hsinchu 300, Taiwan;

E-mail: [ychi@mx.nthu.edu.tw](mailto:ychi@mx.nthu.edu.tw)

<sup>b</sup> Department of Chemistry, National Taiwan University, Taipei 106, Taiwan; E-mail:

[chop@ntu.edu.tw](mailto:chop@ntu.edu.tw)

<sup>c</sup> Institute of Optoelectronic Sciences, National Taiwan Ocean University, Keelung

202, Taiwan; E-mail: [wenhung@mail.ntou.edu.tw](mailto:wenhung@mail.ntou.edu.tw)

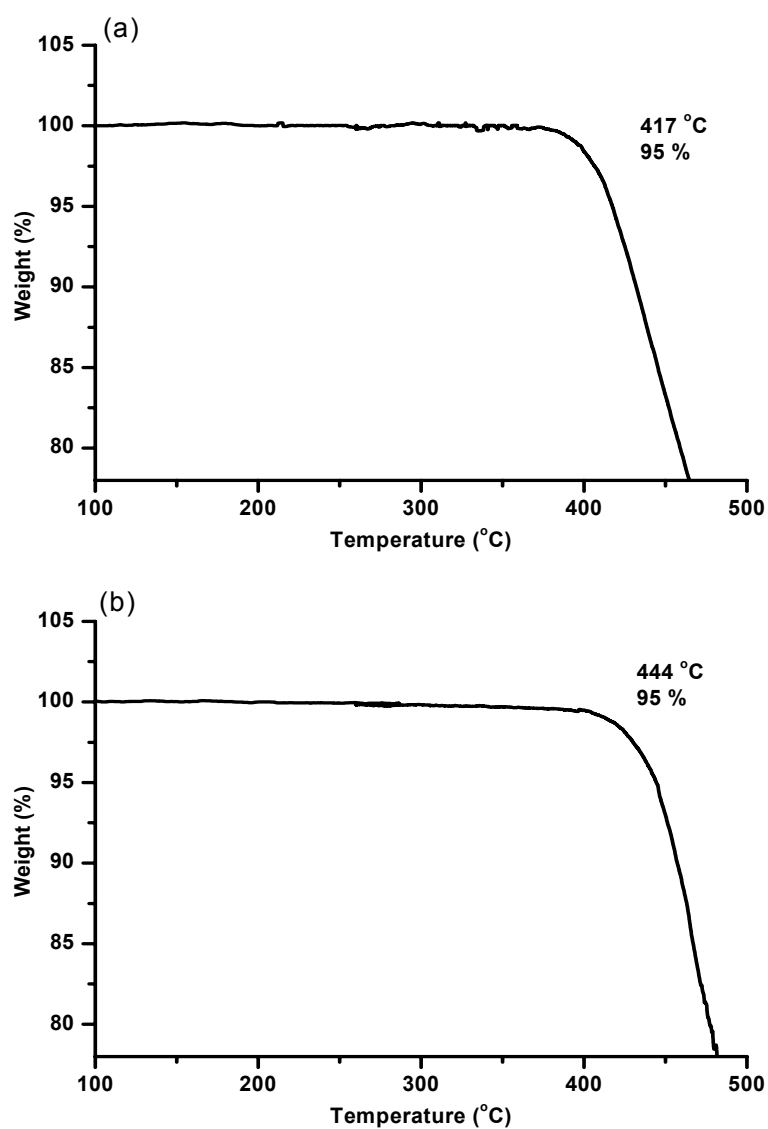

**Figure S1.** TGA data for complexes **6a** (a) and **8a** (b). Thermogravimetric (TGA) data were performed on Seiko SSC 5000 instrument under nitrogen, for which the heating rate was 5 °C/min.

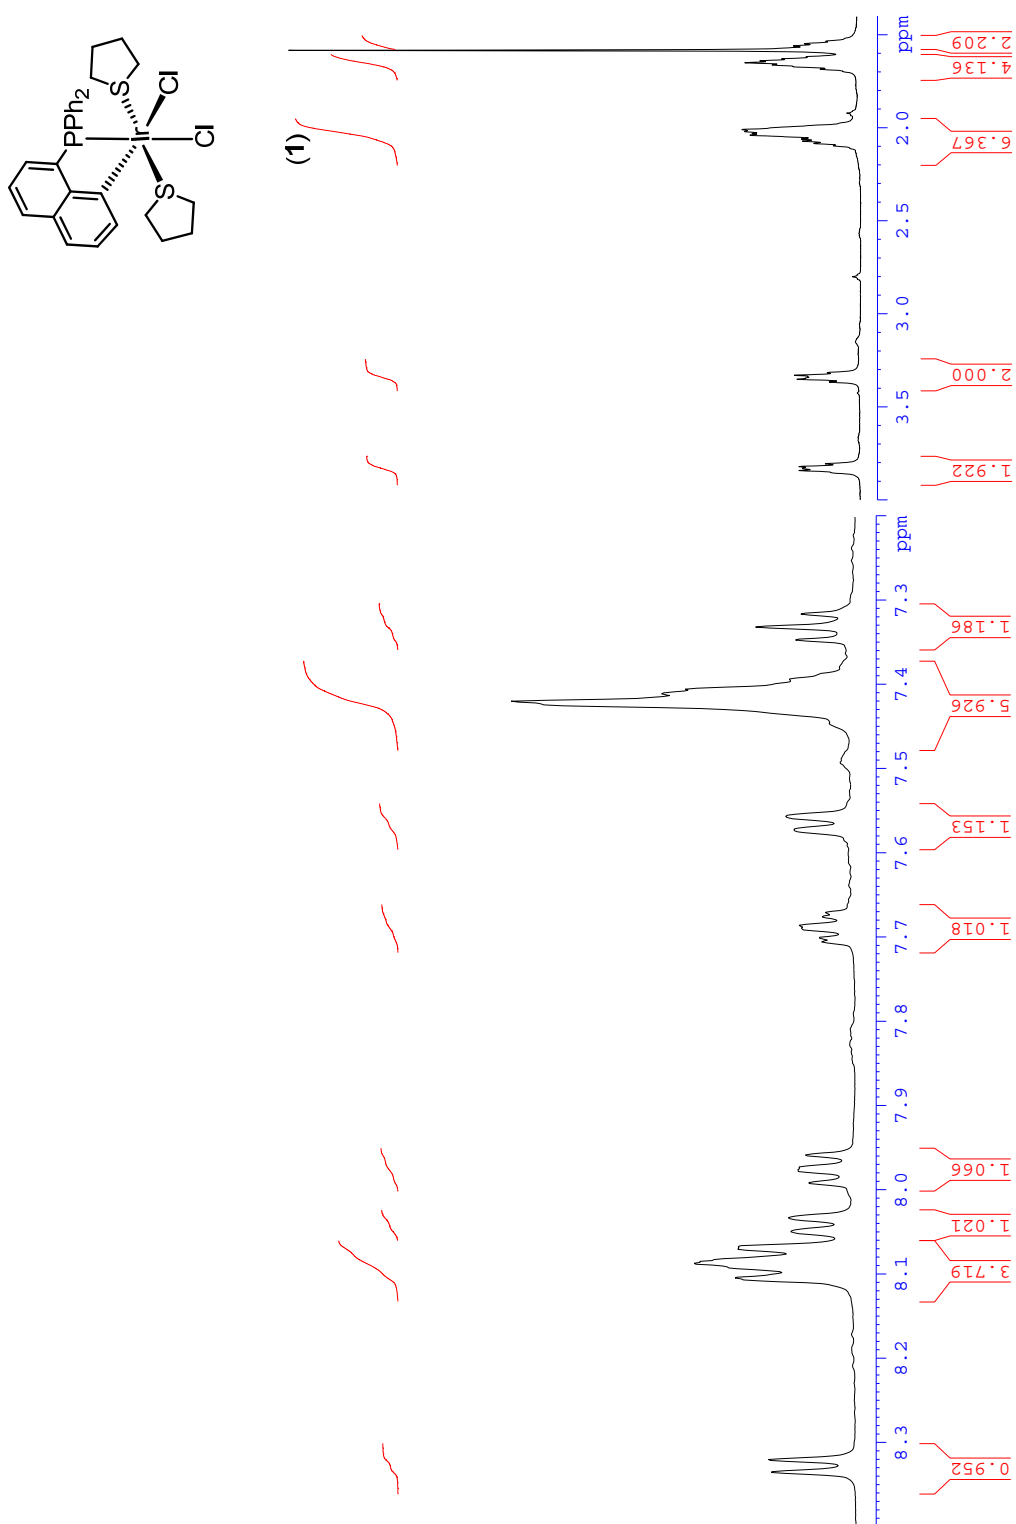

**Figure S2.** <sup>1</sup>H NMR spectrum of complex **1** in CD<sub>2</sub>Cl<sub>2</sub> at 298 K.

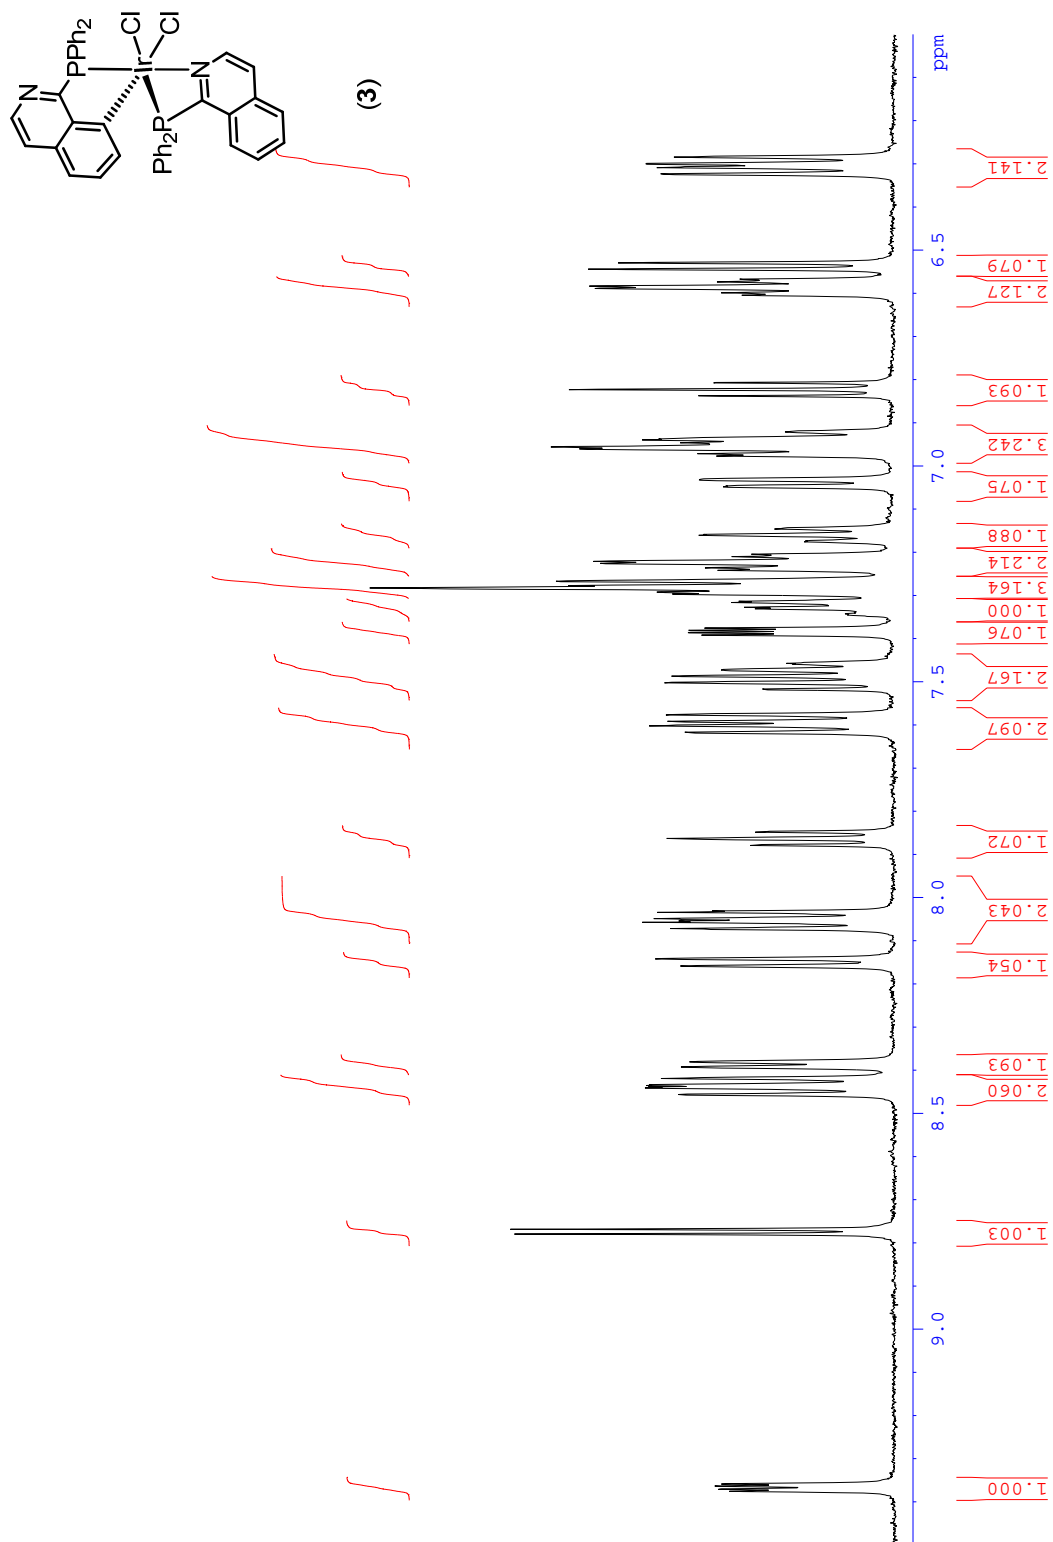

Figure S3.  $^1\text{H}$  NMR spectrum of complex **3** in  $\text{CD}_2\text{Cl}_2$  at 298 K.

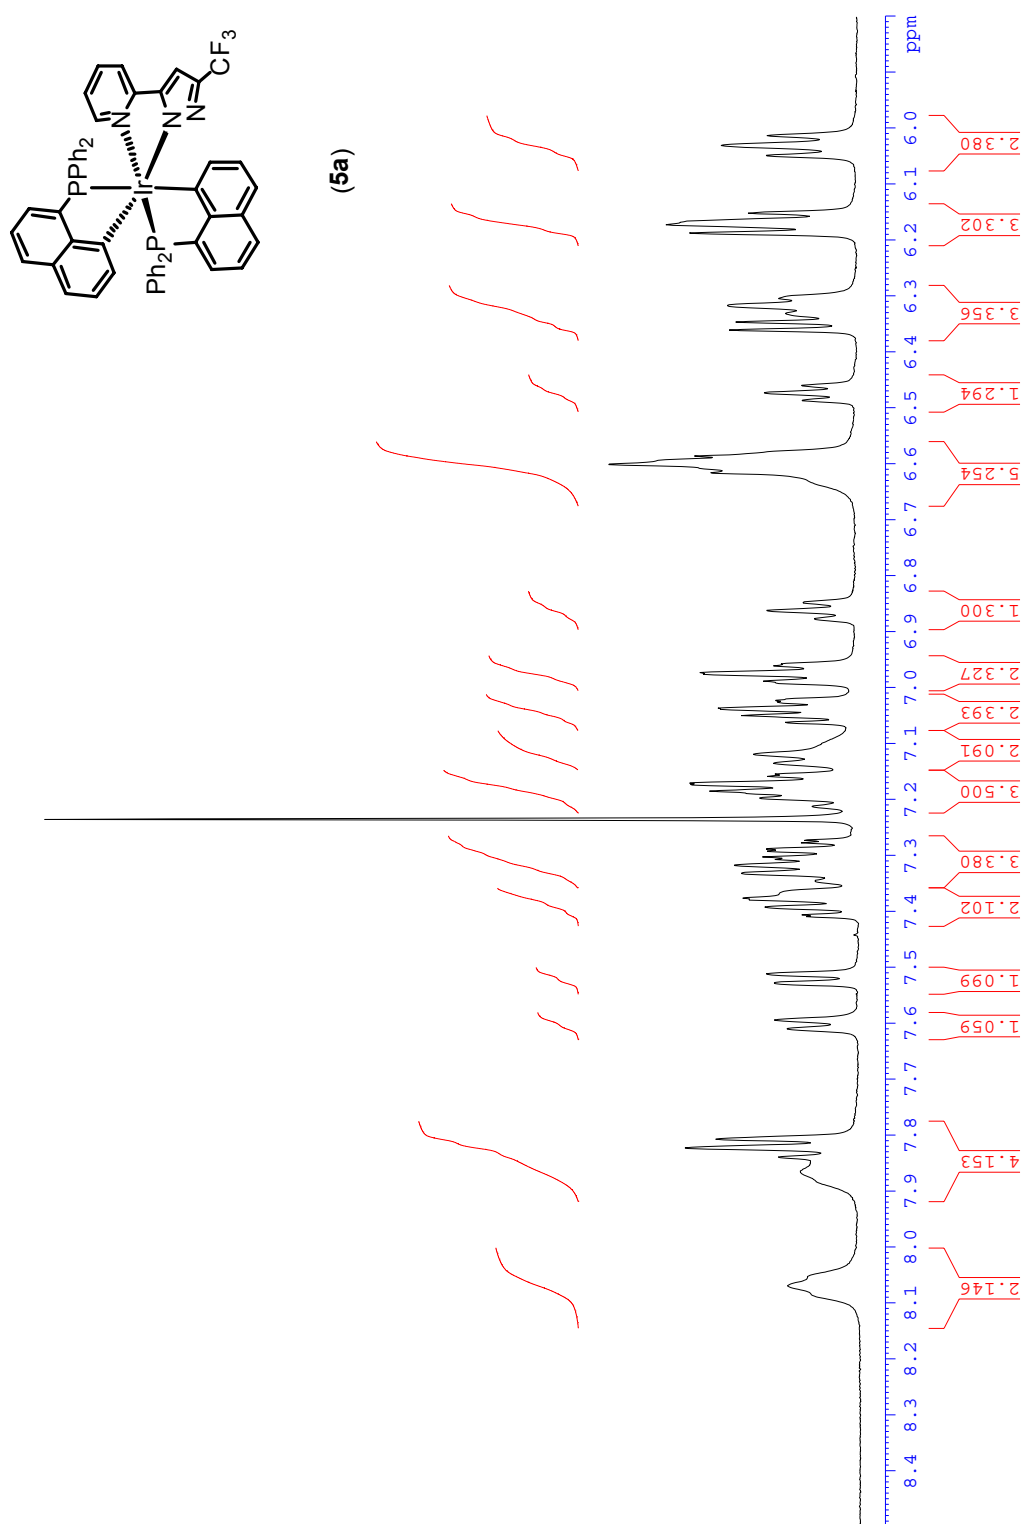

Figure S4. <sup>1</sup>H NMR spectrum of complex 5a in CDCl<sub>3</sub> at 298 K.

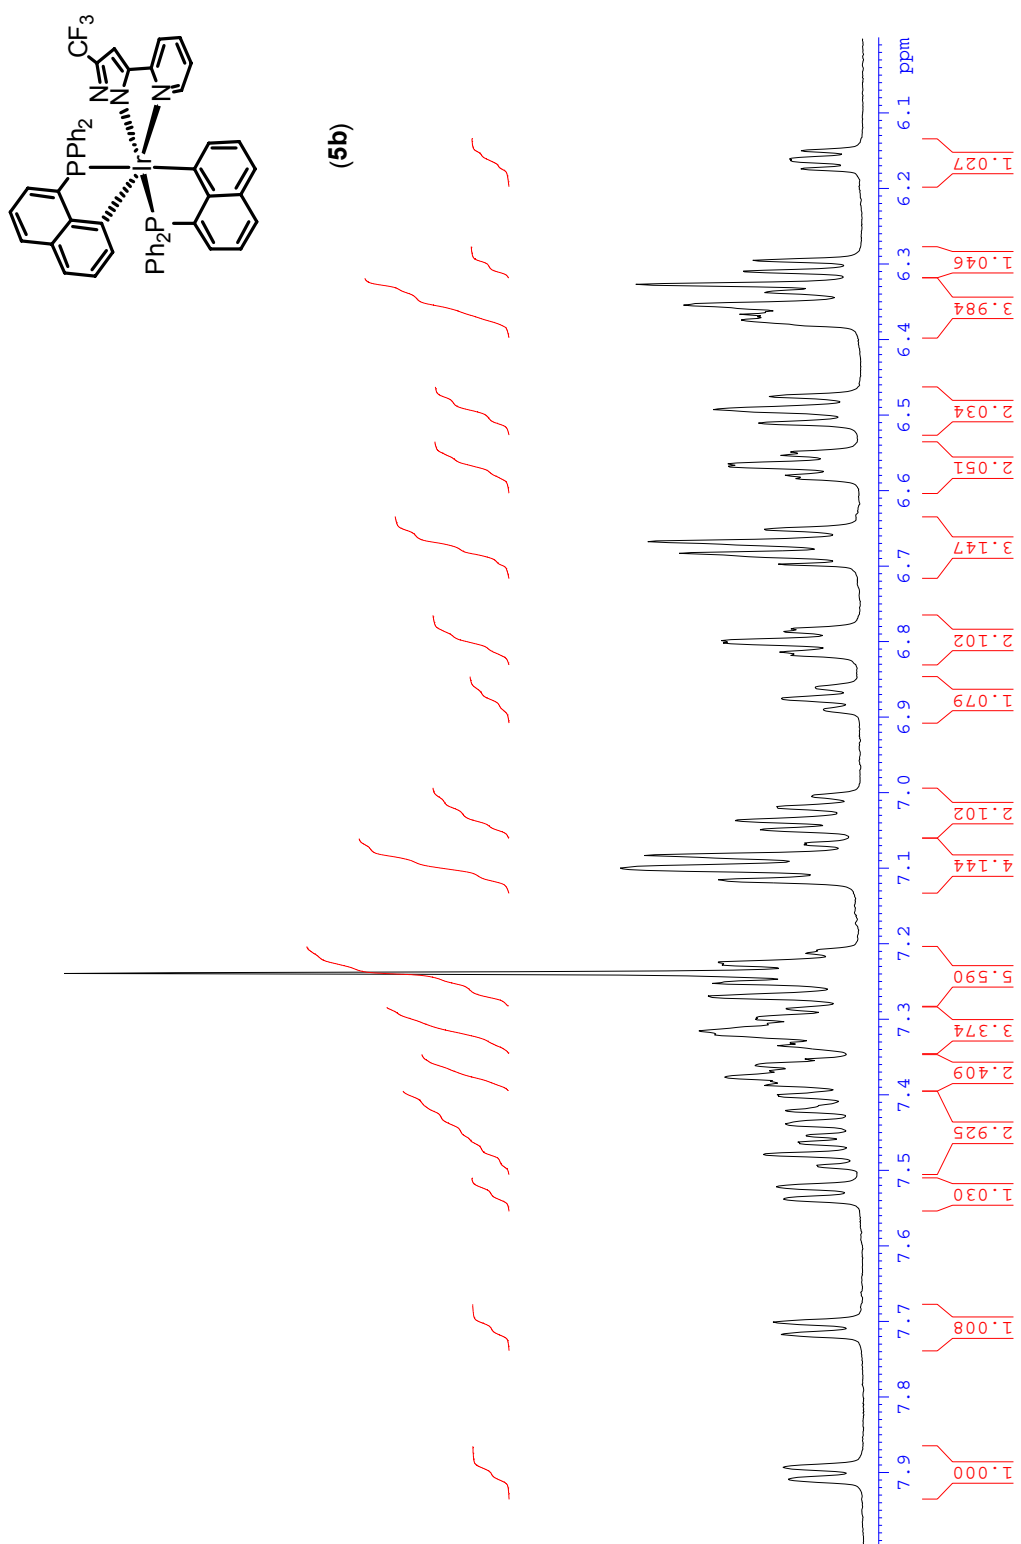

Figure S5. <sup>1</sup>H NMR spectrum of complex 5b in CDCl<sub>3</sub> at 298 K.

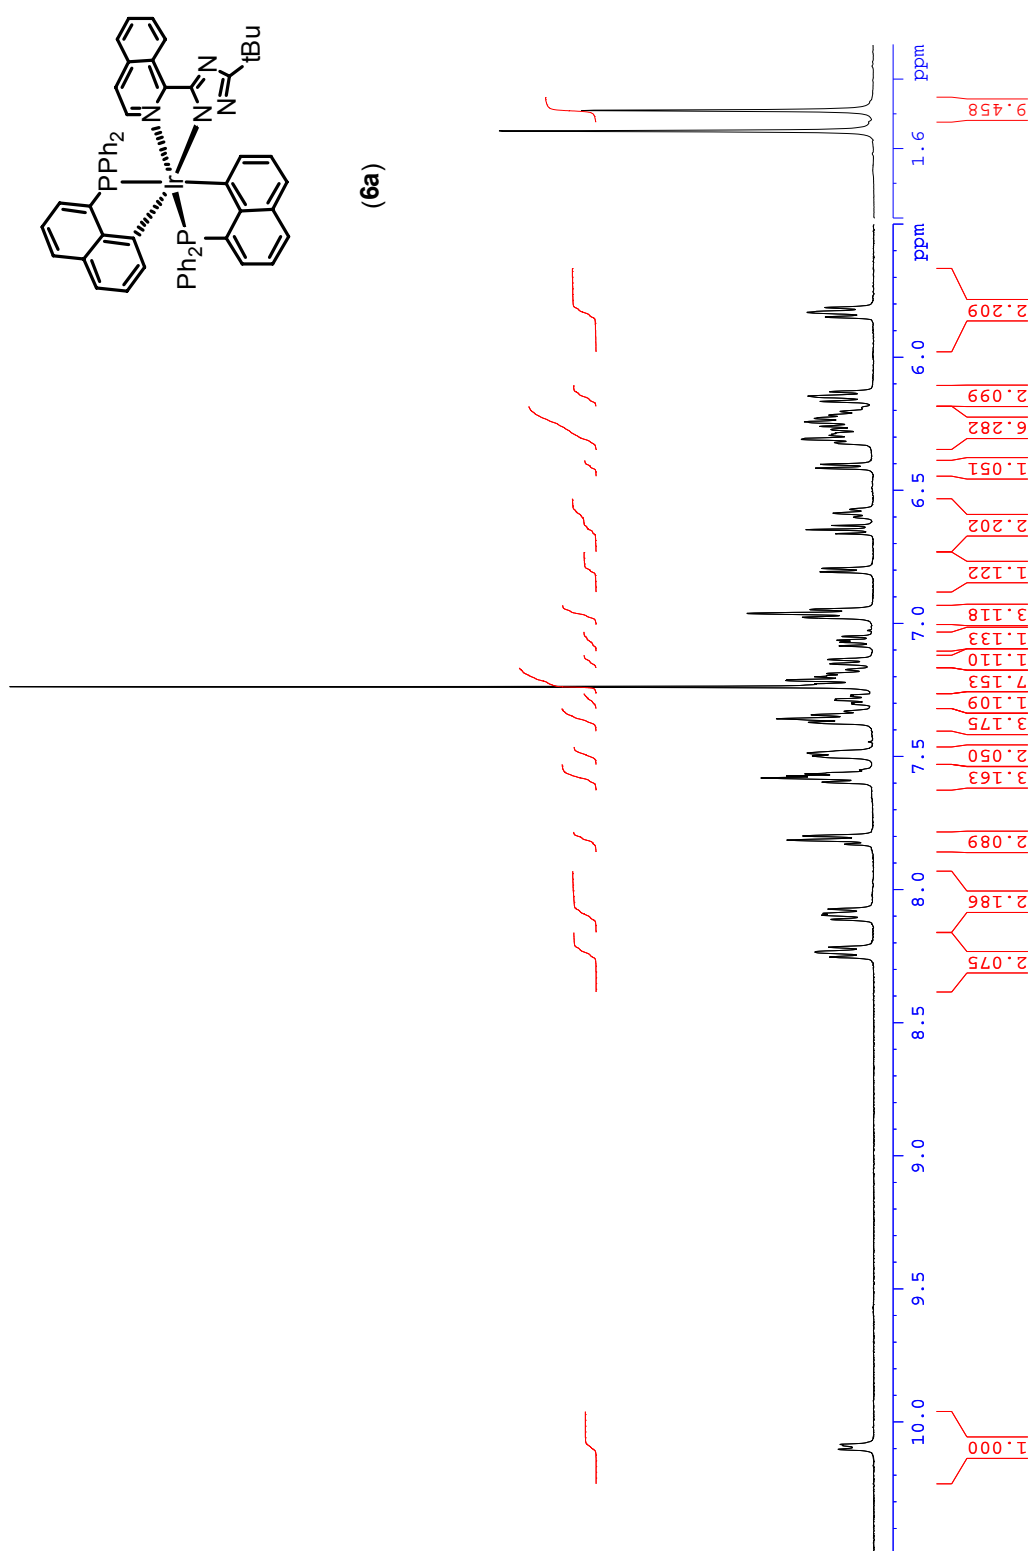

Figure S6.  $^1\text{H}$  NMR spectrum of complex **6a** in  $\text{CDCl}_3$  at 298 K.

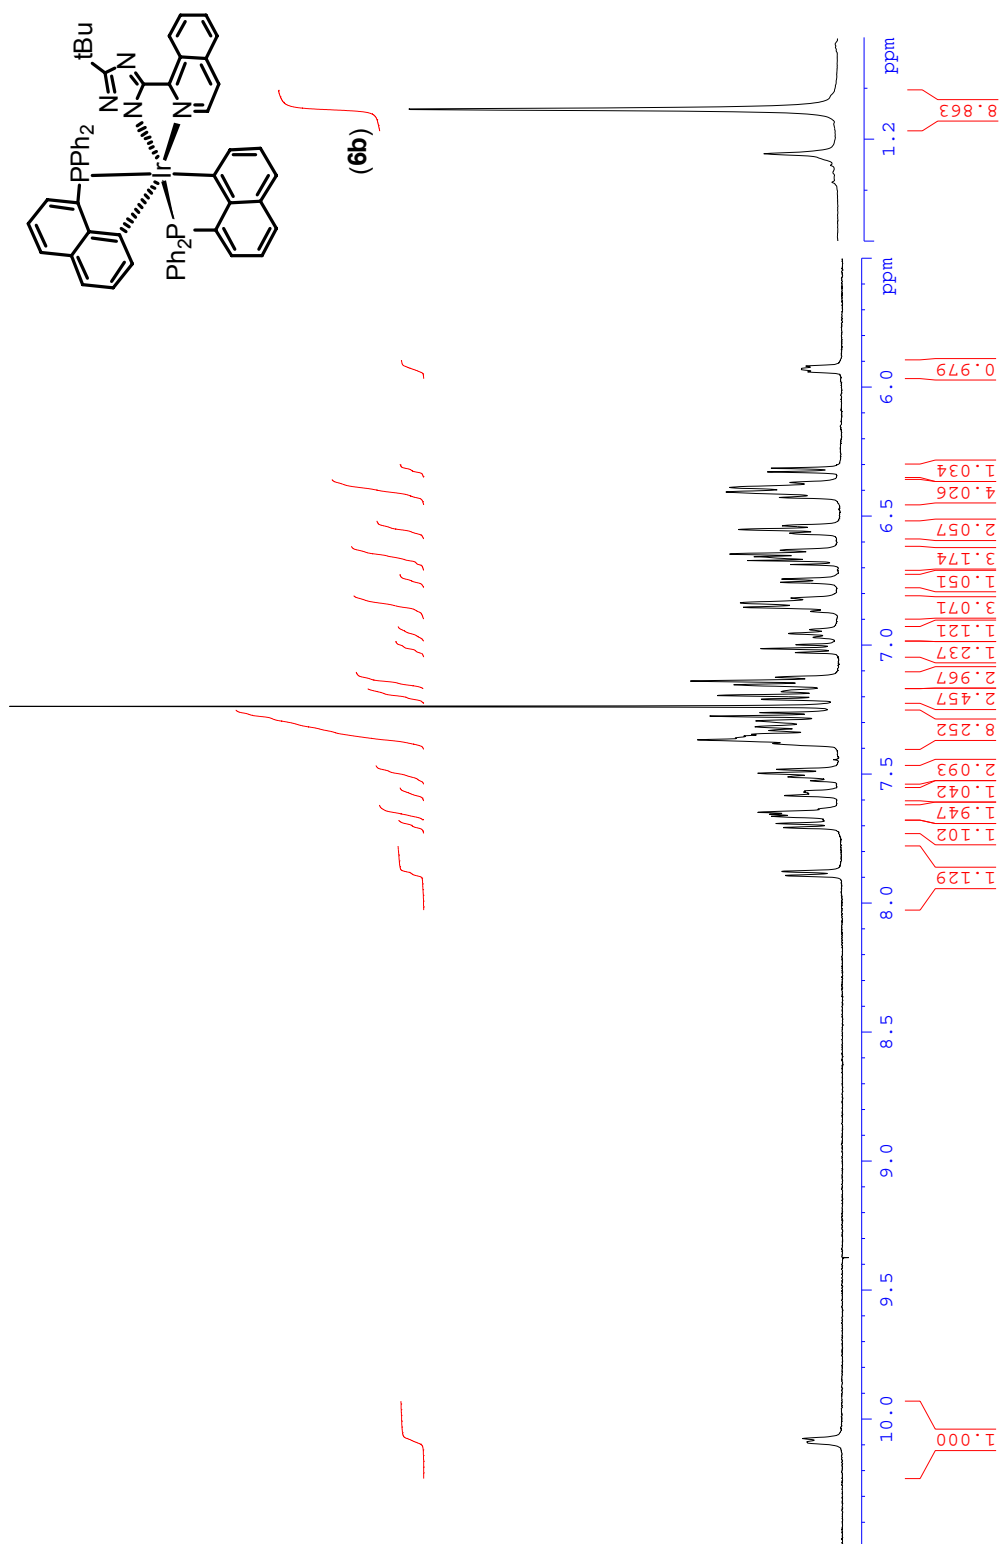

Figure S7. <sup>1</sup>H NMR spectrum of complex **6b** in CDCl<sub>3</sub> at 298 K.



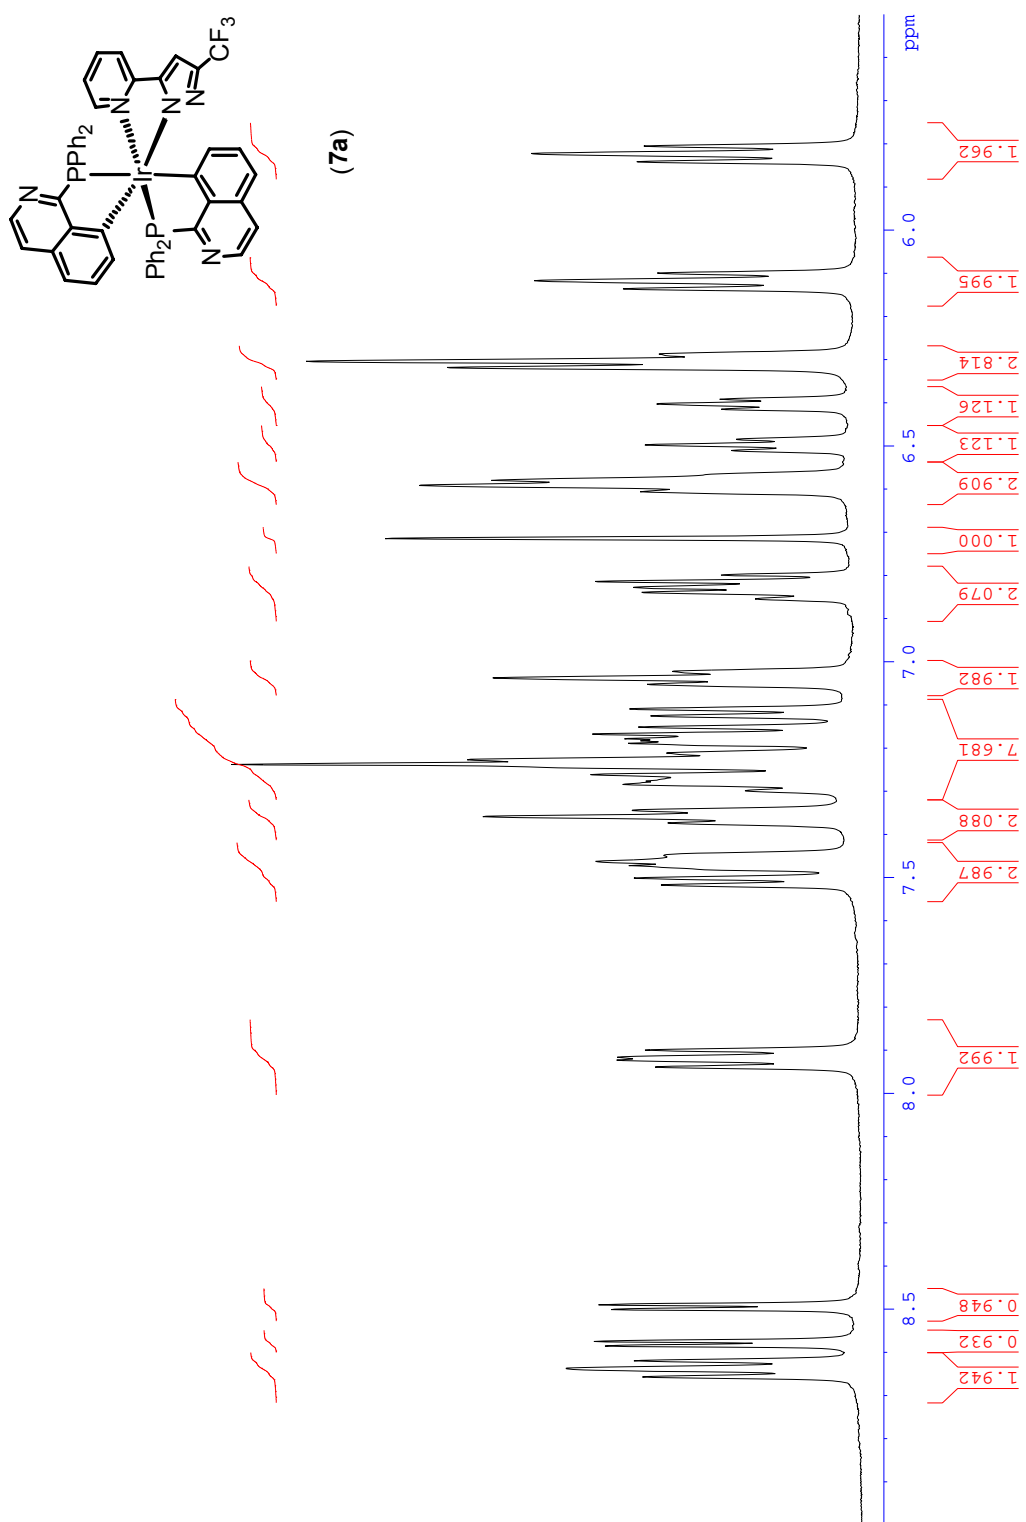

Figure S8.  $^1\text{H}$  NMR spectrum of complex **7a** in  $\text{CDCl}_3$  at 298 K.

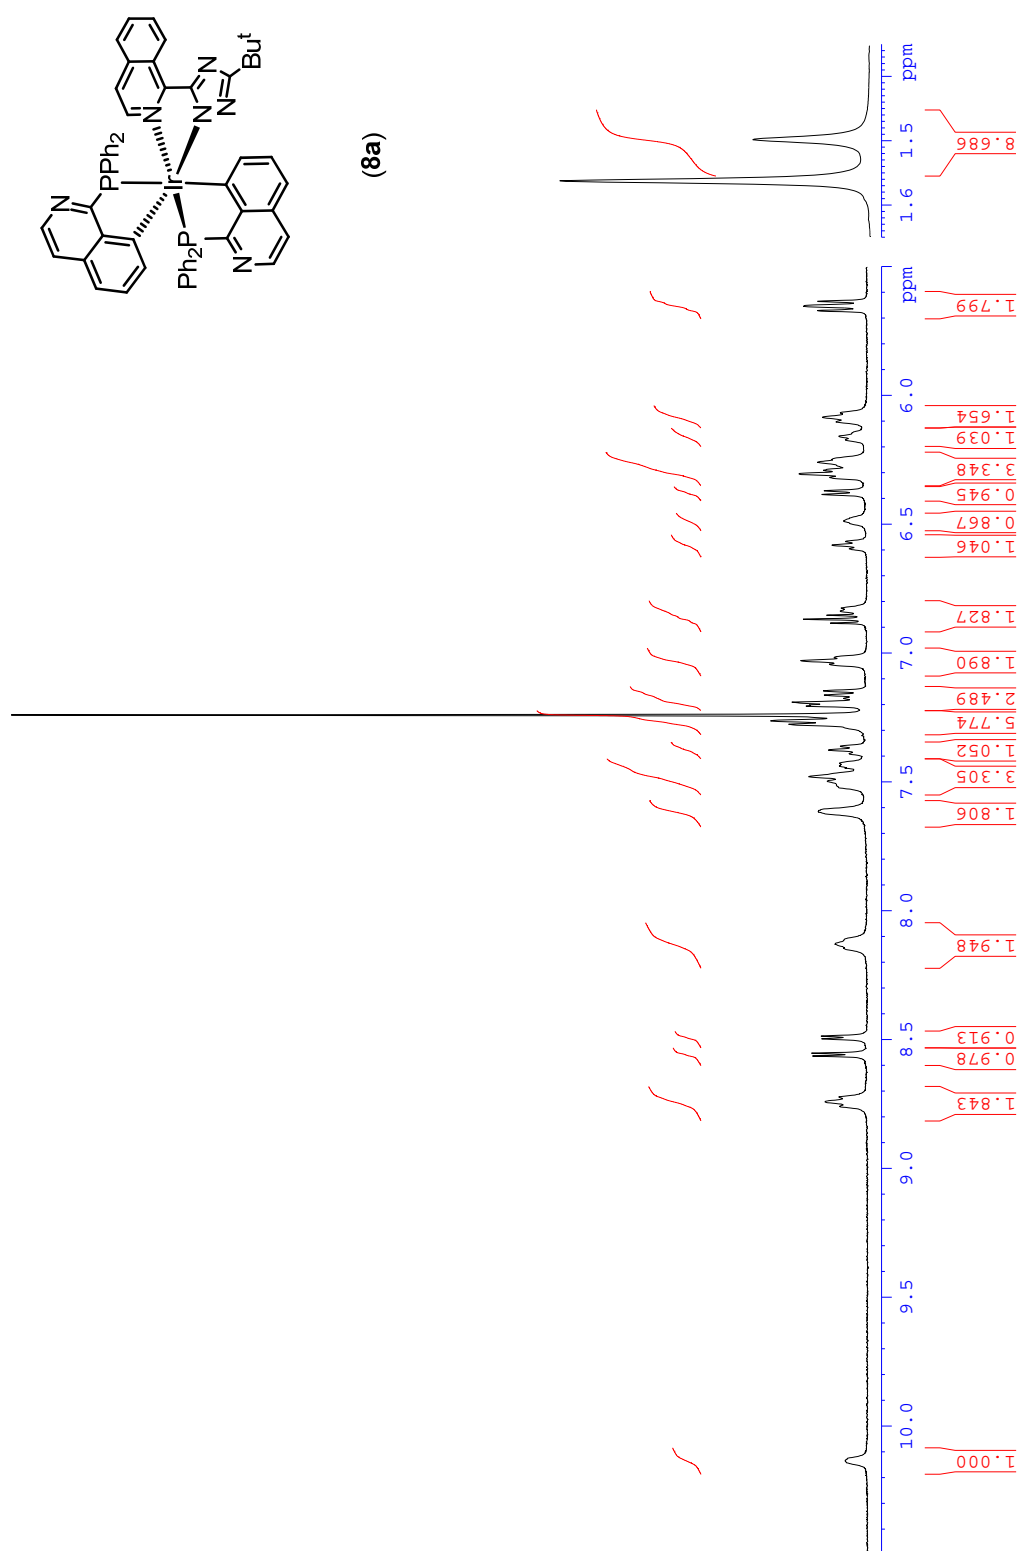

Figure S9.  $^1\text{H}$  NMR spectrum of complex **8a** in  $\text{CDCl}_3$  at 298 K.
